# Supplementary material for: Development of a Gold Nanoparticle-Linked Immunosorbent Assay of Staphylococcal Enterotoxin B Detection with Extremely High Sensitivity by Determination of Gold Atom Content Using Graphite Furnace Atomic Absorption Spectrometry
Source: MDPI journal article supplement (doi:10.3390/pharmaceutics15051493), 2023-05-13
Supplement: s1 [file s1]

# Development of a gold nanoparticles-linked immunosorbent assay of staphylococcal enterotoxin B detection with extremely high sensitivity by determination of gold atoms content using graphite furnace atomic absorption spectrometry

Chaojun Song<sup>1,†</sup>, Yutao Liu<sup>2,†</sup>, Jinwei Hu<sup>2</sup>, Yupu Zhu<sup>2</sup>, Zhengjun Ma<sup>2</sup>, Jiayue Xi<sup>2</sup>, Minxuan Cui<sup>2</sup>, Leiqi Ren<sup>1,\*</sup> and Li Fan<sup>2,\*</sup>

<sup>1</sup> School of Life Science, Northwestern Polytechnical University, Xi'an 710072, China

<sup>2</sup> Department of Pharmaceutical Analysis, School of Pharmacy, Air Force Medical University, Xi'an 710032, China

\* Correspondence: xxfanny@fimmu.edu.cn (Li Fan), renleiqi@nwpu.edu.cn (Leiqi Ren)

† These authors contributed equally to this work.

## This file includes:

### (1) Supplementary figures

- Figure S1. FTIR images of AuNPs before and after modification.

### (2) Supplementary tables

- Table S1. Original data for standard curve of SEB ALISA.
- Table S2. Original data for intraassay of SEB ALISA (n = 8).
- Table S3. Original data for inter-assay of SEB ALISA (n = 8).
- Table S4. Recovery data in Dilution Buffer of SEB ALISA.
- Table S5. Recoveries data of SEB detection by ALISA in various matrices.

## Supplementary figures

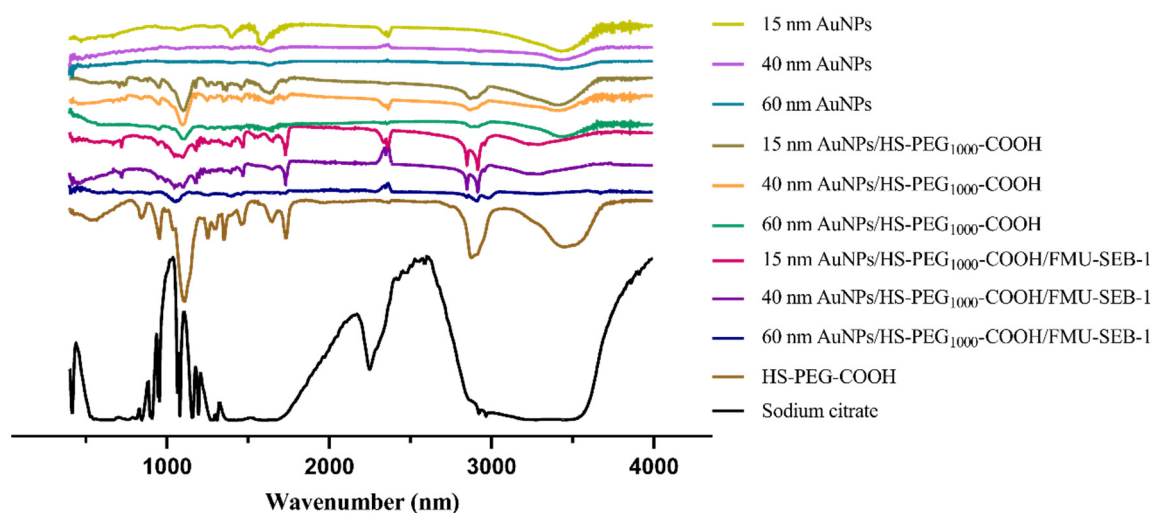

**Figure S1.** FTIR images of AuNPs before and after modification

Before PEG modification, the surface of gold nanoparticles was coated with sodium citrate, so that AuNPs surface showed a broad and blunt O-H stretching vibration absorption peak at  $3413\text{ cm}^{-1}$ . When PEG is modified on the surface, the asymmetric and symmetric stretching vibration peaks of C-H ( $\nu_{\text{asC-H}} 2915\text{ cm}^{-1}$  and  $\nu_{\text{SC-H}} 2869\text{ cm}^{-1}$ ) will appear due to the structure of PEG, as shown in the FigS1. Finally, an amide bond is formed when the carboxyl modified gold nanoparticles are cross-linked with the antibody. In the infrared absorption spectrum, N-H stretching vibration peak ( $\nu_{\text{N-H}}$ ) appears near  $3215\text{ cm}^{-1}$ . This peak can be clearly distinguished from the O-H stretching vibration peak. Therefore, the above characterization indicated that the antibody was successfully labeled to the gold nanoparticles.

## Supplementary tables

**Table S1.** Original data for standard curve of SEB ALISA.

| Size<br>(nm) | SEB<br>concentration<br>(pg/ mL) | Au<br>concentration<br>(ng/ mL) | Au<br>concentration<br>(ng/ mL) | Au<br>concentration<br>(ng/ mL) |
|--------------|----------------------------------|---------------------------------|---------------------------------|---------------------------------|
| 15           | 5                                | 0.278                           | 0.356                           | 0.394                           |
|              | 10                               | 0.602                           | 0.643                           | 0.698                           |
|              | 20                               | 1.614                           | 1.471                           | 1.916                           |
|              | 40                               | 3.312                           | 4.059                           | 4.486                           |
|              | 80                               | 8.047                           | 7.429                           | 7.033                           |
|              | 160                              | 13.240                          | 11.052                          | 16.771                          |
|              | 320                              | 29.139                          | 21.109                          | 25.768                          |
|              | 640                              | 48.272                          | 54.633                          | 58.138                          |
|              | 1280                             | 97.857                          | 92.109                          | 87.720                          |
| 40           | 0.5                              | 0.219                           | 0.388                           | 0.265                           |
|              | 1                                | 0.581                           | 0.441                           | 0.635                           |
|              | 2                                | 1.401                           | 0.963                           | 1.262                           |
|              | 4                                | 3.041                           | 2.413                           | 2.727                           |
|              | 8                                | 7.011                           | 6.809                           | 6.054                           |
|              | 16                               | 14.197                          | 11.603                          | 17.586                          |
|              | 32                               | 25.131                          | 29.962                          | 34.236                          |
|              | 64                               | 61.115                          | 56.418                          | 48.622                          |
|              | 128                              | 92.591                          | 96.157                          | 102.236                         |
| 60           | 0.125                            | 0.274                           | 0.231                           | 0.210                           |
|              | 0.25                             | 0.441                           | 0.546                           | 0.509                           |
|              | 0.5                              | 1.102                           | 1.027                           | 1.388                           |
|              | 1                                | 2.249                           | 2.747                           | 2.611                           |
|              | 2                                | 5.479                           | 5.163                           | 6.094                           |
|              | 4                                | 12.493                          | 11.761                          | 11.128                          |
|              | 8                                | 25.904                          | 24.844                          | 29.074                          |
|              | 16                               | 53.292                          | 45.637                          | 46.633                          |
|              | 32                               | 81.707                          | 87.144                          | 89.264                          |

**Table S2.** Original data for intraassay of SEB ALISA (n = 8).

| batch | Au<br>concentration<br>(ng/ mL) | SEB<br>concentration<br>(pg/ mL) | Au<br>concentration<br>(ng/ mL) | SEB<br>concentration<br>(pg/ mL) | Au<br>concentration<br>(ng/ mL) | SEB<br>concentration<br>(pg/ mL) |
|-------|---------------------------------|----------------------------------|---------------------------------|----------------------------------|---------------------------------|----------------------------------|
| 1     | 6.187                           | 1.933                            | 24.062                          | 8.442                            | 50.993                          | 18.250                           |
| 2     | 5.828                           | 1.802                            | 21.980                          | 7.684                            | 47.429                          | 16.952                           |
| 3     | 6.351                           | 1.992                            | 22.096                          | 7.726                            | 52.064                          | 18.640                           |
| 4     | 5.933                           | 1.840                            | 20.454                          | 7.128                            | 58.903                          | 21.130                           |
| 5     | 5.587                           | 1.714                            | 20.853                          | 7.274                            | 49.036                          | 17.537                           |
| 6     | 5.870                           | 1.817                            | 23.290                          | 8.161                            | 51.709                          | 18.510                           |
| 7     | 5.773                           | 1.782                            | 22.219                          | 7.771                            | 52.380                          | 18.755                           |
| 8     | 5.985                           | 1.859                            | 21.304                          | 7.438                            | 57.936                          | 20.778                           |

**Table S3.** Original data for interassay of SEB ALISA (n = 8).

| batch | Au<br>concentration<br>(ng/ mL) | SEB<br>concentration<br>(pg/ mL) | Au<br>concentration<br>(ng/ mL) | SEB<br>concentration<br>(pg/ mL) | Au<br>concentration<br>(ng/ mL) | SEB<br>concentration<br>(pg/ mL) |
|-------|---------------------------------|----------------------------------|---------------------------------|----------------------------------|---------------------------------|----------------------------------|
| 1     | 6.798                           | 2.155                            | 21.417                          | 7.479                            | 62.982                          | 22.616                           |
| 2     | 5.593                           | 1.716                            | 25.356                          | 8.913                            | 49.291                          | 17.630                           |
| 3     | 5.262                           | 1.596                            | 20.598                          | 7.181                            | 55.064                          | 19.732                           |
| 4     | 5.834                           | 1.804                            | 22.361                          | 7.823                            | 57.732                          | 20.704                           |
| 5     | 5.680                           | 1.748                            | 28.253                          | 9.968                            | 47.723                          | 17.059                           |
| 6     | 6.612                           | 2.087                            | 21.957                          | 7.676                            | 58.490                          | 20.980                           |
| 7     | 6.670                           | 2.109                            | 23.873                          | 8.373                            | 50.950                          | 18.234                           |
| 8     | 5.085                           | 1.531                            | 21.360                          | 7.458                            | 65.765                          | 23.629                           |

**Table S4.** Recovery data in Dilution Buffer of SEB Sandwich ALISA.

|    | Au<br>concentration<br>(ng/ mL) | SEB<br>concentration<br>(pg/ mL) | Au<br>concentration<br>(ng/ mL) | SEB<br>concentration<br>(pg/ mL) | Au<br>concentration<br>(ng/ mL) | SEB<br>concentration<br>(pg/ mL) |
|----|---------------------------------|----------------------------------|---------------------------------|----------------------------------|---------------------------------|----------------------------------|
| 1  | 6.051                           | 1.883                            | 5.952                           | 1.847                            | 5.833                           | 1.804                            |
|    | 20.833                          | 7.266                            | 22.865                          | 8.006                            | 21.960                          | 7.965                            |
|    | 51.922                          | 18.588                           | 51.307                          | 18.364                           | 53.624                          | 19.208                           |
| 2  | 6.302                           | 1.975                            | 5.945                           | 1.845                            | 6.015                           | 1.870                            |
|    | 23.730                          | 8.321                            | 25.083                          | 8.814                            | 22.190                          | 8.049                            |
|    | 52.336                          | 18.739                           | 53.481                          | 19.156                           | 50.924                          | 18.224                           |
| 3  | 6.502                           | 2.047                            | 6.292                           | 1.971                            | 6.113                           | 1.906                            |
|    | 21.156                          | 7.384                            | 20.309                          | 7.075                            | 21.193                          | 8.050                            |
|    | 58.057                          | 20.822                           | 61.541                          | 22.091                           | 60.089                          | 21.562                           |
| 4  | 5.267                           | 1.598                            | 5.633                           | 1.731                            | 5.901                           | 1.829                            |
|    | 19.691                          | 6.850                            | 18.038                          | 6.248                            | 17.207                          | 6.234                            |
|    | 45.976                          | 16.423                           | 43.384                          | 15.843                           | 49.098                          | 17.559                           |
| 5  | 5.981                           | 1.858                            | 5.803                           | 1.793                            | 5.781                           | 1.785                            |
|    | 23.076                          | 8.083                            | 21.048                          | 7.345                            | 20.982                          | 7.609                            |
|    | 52.745                          | 18.888                           | 50.850                          | 18.197                           | 52.031                          | 18.628                           |
| 6  | 6.196                           | 1.936                            | 5.947                           | 1.845                            | 5.897                           | 1.827                            |
|    | 20.974                          | 7.318                            | 21.853                          | 7.638                            | 20.835                          | 7.555                            |
|    | 58.673                          | 21.046                           | 57.780                          | 20.721                           | 57.174                          | 20.500                           |
| 7  | 6.102                           | 1.902                            | 6.930                           | 2.203                            | 6.882                           | 2.186                            |
|    | 20.583                          | 7.175                            | 21.806                          | 7.621                            | 21.733                          | 7.882                            |
|    | 51.380                          | 18.390                           | 52.209                          | 18.692                           | 52.072                          | 18.642                           |
| 8  | 6.124                           | 1.910                            | 6.395                           | 2.008                            | 6.319                           | 1.981                            |
|    | 21.372                          | 7.463                            | 21.484                          | 7.503                            | 23.163                          | 8.403                            |
|    | 48.409                          | 17.309                           | 50.723                          | 18.151                           | 48.901                          | 17.488                           |
| 9  | 5.990                           | 1.861                            | 6.010                           | 1.868                            | 6.302                           | 1.975                            |
|    | 21.926                          | 7.664                            | 20.444                          | 7.125                            | 20.250                          | 7.342                            |
|    | 48.281                          | 17.262                           | 49.892                          | 17.849                           | 45.190                          | 16.136                           |
| 10 | 6.195                           | 1.936                            | 6.031                           | 1.876                            | 6.203                           | 1.939                            |
|    | 20.133                          | 7.011                            | 19.085                          | 6.630                            | 20.519                          | 7.440                            |
|    | 49.072                          | 17.550                           | 50.883                          | 18.209                           | 44.181                          | 16.133                           |

**Table S5.** Recoveries data of SEB detection by ALISA in various matrices.

| matrix        | SEB concentration (pg/<br>mL) | Au concentration<br>(ng/ mL) | Au concentration<br>(ng/ mL) |
|---------------|-------------------------------|------------------------------|------------------------------|
| Dilute buffer | 0.125                         | 0.223                        | 0.230                        |
|               | 1                             | 2.362                        | 2.619                        |
|               | 4                             | 11.710                       | 11.923                       |
|               | 8                             | 22.861                       | 21.335                       |
|               | 16                            | 44.972                       | 43.738                       |
|               | 32                            | 87.056                       | 85.703                       |
| Cure ham      | 0.125                         | 0.263                        | 0.215                        |
|               | 1                             | 2.757                        | 2.555                        |
|               | 4                             | 11.802                       | 13.649                       |
|               | 8                             | 20.461                       | 21.070                       |
|               | 16                            | 45.893                       | 44.501                       |
|               | 32                            | 91.152                       | 95.329                       |
| Roast beef    | 0.125                         | 0.242                        | 0.203                        |
|               | 1                             | 2.580                        | 2.071                        |
|               | 4                             | 11.459                       | 9.098                        |
|               | 8                             | 23.283                       | 24.930                       |
|               | 16                            | 46.369                       | 48.874                       |
|               | 32                            | 84.772                       | 78.360                       |
| Peanut butter | 0.125                         | 0.189                        | 0.227                        |
|               | 1                             | 2.187                        | 2.091                        |
|               | 4                             | 10.135                       | 11.310                       |
|               | 8                             | 20.901                       | 23.936                       |
|               | 16                            | 41.361                       | 37.903                       |
|               | 32                            | 82.657                       | 85.047                       |
| Human serum   | 0.125                         | 0.186                        | 0.203                        |
|               | 1                             | 2.085                        | 2.276                        |
|               | 4                             | 8.943                        | 9.762                        |
|               | 8                             | 21.865                       | 18.910                       |
|               | 16                            | 39.052                       | 37.046                       |
|               | 32                            | 78.203                       | 82.011                       |
| Ketchup       | 0.125                         | 0.218                        | 0.178                        |
|               | 1                             | 2.550                        | 2.792                        |
|               | 4                             | 9.401                        | 11.283                       |
|               | 8                             | 17.606                       | 20.027                       |
|               | 16                            | 44.078                       | 40.526                       |
|               | 32                            | 80.169                       | 76.920                       |
| Milk          | 0.125                         | 0.217                        | 0.186                        |
|               | 1                             | 2.780                        | 2.523                        |
|               | 4                             | 10.387                       | 9.721                        |
|               | 8                             | 24.616                       | 21.932                       |

|               |       |        |        |
|---------------|-------|--------|--------|
| Orange        | 16    | 40.087 | 42.663 |
|               | 32    | 94.761 | 88.090 |
|               | 0.125 | 0.253  | 0.216  |
|               | 1     | 2.101  | 2.501  |
|               | 4     | 10.954 | 11.362 |
|               | 8     | 20.737 | 17.019 |
|               | 16    | 43.923 | 40.338 |
| River water   | 32    | 80.274 | 76.641 |
|               | 0.125 | 0.240  | 0.271  |
|               | 1     | 2.588  | 2.637  |
|               | 4     | 13.971 | 10.783 |
|               | 8     | 23.642 | 25.173 |
|               | 16    | 46.093 | 48.335 |
|               | 32    | 94.601 | 88.730 |
| Blueberry jam | 0.125 | 0.235  | 0.211  |
|               | 1     | 2.039  | 2.372  |
|               | 4     | 12.703 | 10.829 |
|               | 8     | 19.783 | 21.045 |
|               | 16    | 39.717 | 41.531 |
|               | 32    | 80.673 | 83.618 |
| Soybean paste | 0.125 | 0.232  | 0.267  |
|               | 1     | 2.286  | 2.601  |
|               | 4     | 11.292 | 14.093 |
|               | 8     | 24.853 | 22.570 |
|               | 16    | 49.083 | 44.234 |
|               | 32    | 90.704 | 93.038 |
| Apple juice   | 0.125 | 0.206  | 0.181  |
|               | 1     | 1.932  | 2.349  |
|               | 4     | 9.536  | 11.569 |
|               | 8     | 20.412 | 23.385 |
|               | 16    | 37.081 | 39.369 |
|               | 32    | 86.701 | 90.819 |
